# Supplementary material for: Effect of Potassium Doping on the Structural and Catalytic Properties of Co/MnOx Catalyst in the Steam Reforming of Ethanol
Source: MDPI journal article supplement (doi:10.3390/ma16155377), 2023-07-31
Supplement: s1 [file s1]

## Effect of Potassium Doping on the Structural and Catalytic Properties of Co/MnO<sub>x</sub> Catalyst in the Steam Reforming of Ethanol

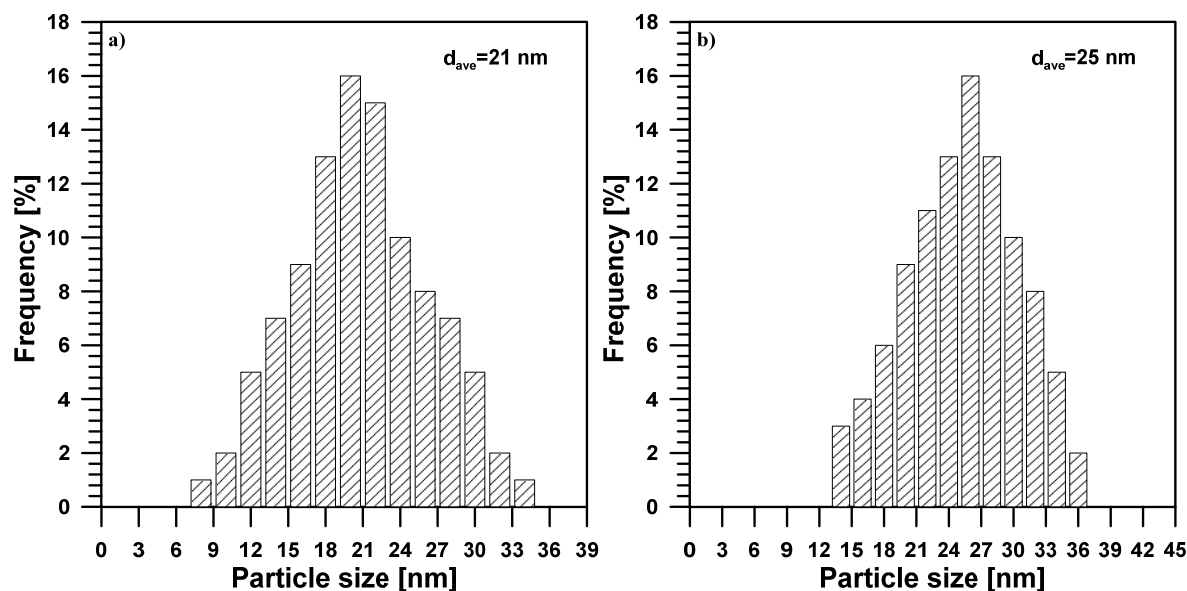

**Figure S1.** Particle size distribution histograms for (a) Co/MnO<sub>x</sub> and (b) KCo/MnO<sub>x</sub> catalysts reduced at 500 °C.
